## **Multi-dimensional prediction of suicidality and non-suicidal self-injury transition in children: from general psychopathological, behavioural, and neurobiological perspectives**

Xue Wen BSc<sup>1\*</sup>, Qiyang Qu PhD<sup>1\*</sup>, Yinzhe Wang Msc<sup>1</sup>, Xiaoqian Zhang MD, PhD<sup>2#</sup>, Zaixu Cui PhD<sup>3</sup>, Runsen Chen PhD<sup>1#</sup>

1. Vanke School of Public Health, Tsinghua University, Beijing, China
2. Department of Psychiatry, Tsinghua University Yuquan Hospital, Beijing, China
3. Chinese Institute for Brain Research, Beijing 102206, China

\*Contributed equally

#Correspondence to: Dr. Runsen Chen at [runsenchen@tsinghua.edu.cn](mailto:runsenchen@tsinghua.edu.cn), Dr. Zaixu Cui at [cuizaixu@cibr.ac.cn](mailto:cuizaixu@cibr.ac.cn) and Dr. Xiaoqian Zhang at [xiaoqian1211@tsinghua.edu.cn](mailto:xiaoqian1211@tsinghua.edu.cn)

## **IMPORTANCE**

Accurate prediction of suicide or non-suicidal self-injury (NSSI) among children within a uniform time frame is an essential but challenging task. Furthermore, few studies have comprehensively considered clinical, behavioural, and neurobiological factors to produce multi-dimensional prediction models.

## **OBJECTIVE**

To examine predictive effects of general psychopathology, behavior inhibition system, and brain signature on children's suicidality or NSSI transition.

## **DESIGN, SETTING, AND PARTICIPANTS**

We adopted a retrospective and longitudinal methodology by utilising the data from the Adolescent Brain Cognitive Development (ABCD) cohort. In total, 9332 individuals aged 9-10 years without any suicidality or non-suicidal self-injury (NSSI) history at baseline were included in our analyses. Then, four subgroups were generated based on whether they had developed suicide ideation (Healthy control [HC]-SI), NSSI (HC-NSSI) or suicide attempt (HC-SA) in a year, while the remaining group was considered a control group (HC-HC).

## **MAIN OUTCOMES AND MEASURES**

Participants suicidal behaviors and non-suicidal self-injury behaviors were assessed with the Kiddie Schedule for Affective Disorders and Schizophrenia. Meanwhile, general psychopathology (i.e., *p-factor*) was calculated based on scores of Child Behavior Checklist, behavioral inhibition system (BIS) was assessed through BIS/BAS scale, and the brain morphometrics were also collected through sMRI. Multinomial logistic regression models were used for assessing the predictive effects of general psychopathology, behavioral inhibition system, and whole-brain cortical area on children's STB and NSSI transition.

## **RESULTS**

As a result, we found higher general psychopathology in baseline predicted higher NSSI (1.52 [1.28-1.80]), SI (OR=1.34 [95% CI 1.17-1.53]) and SA (2.05 [1.34-3.14]) risk in a year. From a behavioural perspective, higher BIS sensitivity predicted higher SI (2.05 [1.61, 2.61]), and NSSI (1.68 [1.24, 2.28]) in a year. From a neurobiological perspective, abnormalities in the cortical area of the superior insula, inferior frontal area, superior temporal area, and superior precentral area were all shown to be associated with children's NSSI, SI and SA in the future.

## **CONCLUSIONS AND RELEVANCE**

This study is the first to look at the predictive factors for the different transitions of NSSI and suicidal behaviour from the biopsychosocial framework. Our findings offered empirical evidence on the predictive effect of baseline general psychopathology, BIS sensitivity and biological marker on children's suicidality or NSSI in a year, providing early biomarkers for all types of transition. In this case, the early identification of those factors may facilitate the development of early prevention or intervention that could potentially alleviate more relevant public health issues.

## **Key Points**

### **Question**

Could general psychopathology, behavior inhibition system, and brain signature predict suicidality or NSSI transition in children?

### **Findings**

In a longitudinal observational study (9332 children), higher general psychopathology at baseline predict higher risk of suicidality and NSSI transition in a year. Meanwhile, higher BIS sensitivity also predict higher risk of suicidality and NSSI transition. To note, abnormalities in the cortical area of the superior insula, inferior frontal area, superior temporal area, and superior precentral area were all shown to be associated with children's suicidality and NSSI transition.

### **Meaning**

The early identification of biopsychosocial factors associated with suicidality or NSSI transition in children could facilitate early prevention.

## Introduction

Self-harm, as an umbrella terminology, refers to non-suicidal self-injury (NSSI), suicide ideation or suicidal behaviours (also frequently being referred to as “Suicidal thoughts and behaviour”; STBs), is an alarming public health problem in adolescents worldwide<sup>1</sup>. As a precursor of STBs, it has been reported that the pooled NSSI prevalence was 17% amongst adolescents<sup>2</sup>, sharply increasing to over 40% during acute stress times such as during the pandemic<sup>3</sup>. A population-based study of 82 countries has reported that the prevalence of suicidal ideation was nearly 14.0% among adolescents<sup>4</sup>. Additionally, as the second leading cause of death for adolescents<sup>5,6</sup>, suicide behaviour’s prevalence accounted for 11.0% among adolescents in a large cross-national study<sup>7</sup>. The negative effect of NSSI and STBs on adolescents’ development outcomes has been highlighted in several systematic reviews and meta-analyses, including changes in brain structure<sup>8</sup>, poorer academic outcomes, higher mental health problems, and delinquent behaviour, which may last from childhood to adulthood<sup>9</sup>.

Therefore, it has become an obligation for health professionals to identify the underlying mechanism that can prospectively predict the occurrence process, which is essential for developing effective prevention or intervention program at an early stage. The “continuum” model has recognized that these self-harm behaviours should best be conceptualized along a continuum, highlighting the existing shared and unique risk factors across these behaviours<sup>10</sup>. For example, several studies have highlighted the modifiable characteristics associated with NSSI and STBs, including cognitive appraisal factors<sup>11</sup>, psychiatric morbidity<sup>12</sup>, and lower

levels of social support. Nevertheless, to what extent these factors contribute to the process of emergence for these subgroups of self-harm behaviours remains equivocal. More importantly, researchers have long been interested in how people who accidentally persist in NSSI are similar or differ from individuals who report suicidal ideation or engage in suicide attempts, but the nature of the underlying mechanism remained unclear.

The impact of internalizing and externalizing psychopathology on the occurrence of NSSI or STBs has received extensive attention. For example, a recent meta-analysis found that the symptoms of major depressive disorder and anxiety disorders predicted the onset of NSSI<sup>13</sup>. In line with this, Hills and colleagues (2009) found that externalizing psychopathology (e.g., antisocial personality disorder) was the risk factor for the later development of new-onset suicide attempts. Lately, instead of perceiving mental disorders as distinct, episodic and categorical conditions, an increasing number of researchers have suggested that one general psychopathology dimension exists, which is referred to as the *p-factor*<sup>14</sup>, or general psychopathology<sup>15,16</sup>. The *p-factor* has been suggested to be strongly associated with NSSI and suicidality<sup>17</sup>. However, the prediction role of the *p-factor* on the similar or distinguished trajectory of occurrence of NSSI and STBs still requires further exploration.

Additionally, behavioural inhibition systems (BIS), as an aversive motivational system activated by signals of punishment, have been a major focus of NSSI and STBs studies. Generally speaking, a common assumption suggested by most theories suggests that NSSI or STBs is primarily motivated by the strong desire to escape from intense emotional pain or aversive situations<sup>18,19</sup>. In this case, an individual's higher sensitivity to aversive stimuli may lead to the

consequence of more maladaptive avoidant behaviours<sup>20</sup>. This perspective is supported by several studies, which found that individuals' BIS was positively associated with their likelihood of NSSI or STBs in several cross-sectional studies<sup>21,22</sup>. In addition, a previous study found that individuals with a higher level of BIS reported more severe forms of suicidality<sup>20</sup>. However, to what extent the BIS predicted the onset of different subgroups of NSSI or STBs still to this day remains unclear.

Despite detecting clinical and behavioural predictors, neuroimaging is the most promising new direction for predicting STB and NSSI transition. A recent meta-analysis of 131 neuroimaging studies found structural and functional alterations in the brain associated with STB, which converges in the prefrontal cortex (PFC), insula, cingulate cortex (CC), temporal regions, as well as other cortical regions.<sup>23</sup> Meanwhile, the same regions were also shown in a recent neuroimaging meta-analysis about NSSI in youth.<sup>24</sup> Indeed, due to the high co-occurrence of STB and NSSI, it is not surprising to find a common neurobasis underlying these behaviours.<sup>3</sup> However, there is a scarcity of studies that combine 1) longitudinal study design, 2) large sample sizes, and 3) target subjects in critical periods of development (i.e., children). Emphasis on detecting neurobiological markers of future STB and NSSI transition is necessary due to its importance in guiding our preventive programs.

Using data from a large cohort study and following the framework of the biopsychosocial model, we thus aimed to investigate the risk factor which predicted the NSSI and STBs transition, including neuroimaging, general psychopathology, and impulsivity behaviours perspectives.

## Methods

### Data sources

We included data from the Adolescent Brain and Cognitive Development (ABCD) “Curated Annual Released 4.0 version”<sup>25</sup>. Data for all included measures were collected at baseline for 11,875 participants between 2016 and 2018, with the exception of STB and NSSI transition-related data being collected at 1-year follow-up. Written informed consent from caregivers and verbal assent from children were obtained. All procedures were approved by the centralised institutional review board (IRB) from the University of California, San Diego, and each study site obtained approval from its local IRB.

### Measurements

**STB and NSSI transition** The child-report version of the suicide module from the computerised Kiddie Schedule for Affective Disorders and Schizophrenia (KSADS, Lifetime version) was utilized to assess children’s lifetime SI, NSSI, and SA.<sup>39</sup> To note, participants were coded as having SI if they endorsed SI in any of the following five domains: passive, active but non-specific, specific method, active with intent, and active with a plan. Both baseline and 1-year follow-up assessments were considered to describe children’s STB and NSSI transition.

**General Psychopathology** The parent-report version of the Child Behavior Checklist (CBCL for ages 6 to 18) was used to assess children’s problematic behaviours that needed attention<sup>17</sup>. All of the 119 items were scored on a 3-point Likert scale ranging from 0 (“not true”) to 2 (“very true”). According to an established bifactor model, which has been tested for good reliability and validity, four-dimensional psychopathology factors were derived. Only 66 items were concluded

in the final model, and then the general factor scores (named *p-factor*) were calculated for each participant. The general psychopathology scores were only calculated at baseline<sup>26</sup> . Due to the parent-child discrepancy observed in KSADS diagnoses in previous studies, two items (i.e., “Deliberately harms self or attempts suicide”, “Talks about killing self”) out of the bi-factor model were selected as the additional STB and NSSI screening items.

**Behaviour System** The Behavioral Inhibition/Activation Scales (BIS/BAS) administered to children were also utilized in the present study. They were both scored on a 4-point Likert scale ranging from 0 (“not true”) to 3 (“very true”). The BIS scale<sup>27</sup>, consisting of 7 items, is concerned with motivation to avoid aversive outcomes.

**Brain Morphometry** All preadolescents underwent structural Magnetic Resonance Imaging (sMRI) according to the ABCD study’s standardised protocol, while the scanning parameters, pre-processing, and analytical pipelines were described in considerable detail.<sup>40,43</sup> FreeSurfer v5.3 (<http://surfer.nmr.mgh.harvard.edu>) was used to process the locally acquired T1-weighted images to estimate global cortical area. Then the cerebral cortex was parcellated into 74 regions according to the Desikan-Killiany atlas.<sup>44</sup> Only scans that passed protocol compliance and quality control were used for corresponding analyses.

### **Statistical Analysis**

In total, the 11,875 participants were subset to 9332 if they 1) reported no lifetime SI, SA, and NSSI at baseline, 2) passed the CBCL screening item reported by their caregivers (i.e., got a “0” score in both items), and 3) had complete sociodemographic and STB and NSSI transition-



related information. Sociodemographic information, including children's age, sex, race/ethnicity, and data acquisition sites, were used as covariates. All statistical analyses were performed using SPSS (version 26.0) and MATLAB (version 2022a). An overview of our analysis pipeline can be seen in Figure 1, while detailed information related to all the used variables is shown in Appendix p1.

First, participants were divided into four groups due to their mental health condition in 1-year follow-up. Children were classified as 1) the HC-SA group if they reported SA from baseline and 1-year follow-up, 2) the HC-NSSI group if they had NSSI but no SA, 3) the HC-SI group if they only reported SI rather than self-harm behaviour or 4) the HC-HC group if they reported no lifetime SI, SA, and NSSI themselves and passed the CBCL screening items during that time.

Next, we assessed whether subjects exhibited differences in dimensional psychopathology, behavioural system, or brain morphometry at baseline, even if they did not start to transit. The multivariate analysis of covariance (MANCOVA) was used to compare the group differences within the four subgroups (i.e., HC-HC, HC-SI, HC-NSSI, and HC-SA), and then pairwise comparisons were further conducted.

Finally, the predictive effects of dimensional psychopathology, behavioural system, and brain morphometry on children's STB and NSSI transition in a year were further examined. A series of multinomial logistic regression models were performed, and an odds ratio (OR) was calculated for each analysis to characterize the strength of the associations. For the psychopathology aspect, the independent variables included participants' factor scores on general, externalizing, attention-

deficit/hyperactivity disorder (ADHD), and internalizing psychopathology. For the behavioural aspect, the independent variables included subscale scores of BIS, BAS-reward, BAS-drive, and BAS-fun seeking. For sMRI analysis, only 8971 scans that passed the quality control were taken into the subsequent analyses. Then, all 74 cortical areas were put into the model for prediction analysis. The false discovery rate (FDR) was further used to avoid the potential bias arising from multiple comparisons.<sup>46</sup>

### **Role of the funding source**

No funding source had involvement in the study design, in the collection, analysis, and interpretation of data, in the writing of the report, and in the decision to submit the paper for publication. All authors had full access to all the data in the study and confirmed their responsibility for the decision to submit it for publication.

### **Results**

For 9332 eligible subjects without any STB and NSSI history at baseline, four subgroups were generated based on whether they developed SI (HC-SI, N=350), NSSI (HC-NSSI, N=225), SA (HC-SA, N=32) in a year or not (HC-HC, N=8725). The baseline demographic details of four subgroups are summarized in Table 1.

### **General psychopathology predicts children's STB and NSSI transition**

We found that the children showed differences in general psychopathology even before the transition occurred ( $F=19.77$ ,  $P<0.001$ ). To note, after FDR correction, the HC-SA group performed the highest level of general psychopathology at baseline, while the HC-HC group

performed the lowest in general psychopathology compared to the STB and NSSI transition groups (Figure 2). Furthermore, a higher level of general psychopathology was shown to predict severer SI (OR=1.34 [95%CI 1.17-1.53]), NSSI (1.52 [1.28-1.80]), and a higher frequency of SA (2.05 [1.34-3.14]) transition risk in a year, suggesting a common marker for children's STB and NSSI transition (Figure 3).

### **The behavioural system predicts children's STB and NSSI transition**

Group differences in BIS were also found ( $F=20.24$ ,  $P<0.001$ ). In the pairwise comparisons, all the transition groups (i.e., HC-SI, HC-NSSI, and HC-SA) obtained higher BIS scores than the control group (i.e., HC-HC). Besides, as is also shown in Figure 3, a high BIS score predicted high SI (2.05 [1.61, 2.61], and NSSI (1.68 [1.24, 2.28]) transition risk in a year.

### **Neurobiological markers of children's STB and NSSI transition**

Overall, abnormalities in the cortical area of the prefrontal cortex (e.g., inferior frontal gyrus; IFG), insula, cingulate cortex, temporal cortex (e.g., inferior temporal sulcus; ITS), precentral cortex, and lateral sulcus were all shown to predict children's SI, NSSI, and SA transition (all FDR-corrected  $P<0.05$ ). To be more specific, we found that 19 out of the 74 regions could significantly predict children's SI transition in a year, 15 for NSSI transition, and 29 for the prediction of SA transition (Figure 4). Besides the common cortical regions associated with SI, NSSI, and SA transition simultaneously, SA transition was also predicted by altered cortical areas of the parietal and occipital cortex, suggesting a widely distributed characteristic area.

## **Discussion**

Through several findings, this study addressed the gaps in the predictor factors of onset for different subgroups of NSSI or STBs. Our results suggested that 1) the common cortical regions, including the prefrontal cortex (PFC), insula, and cingulate cortex (CC), would predict the onset of NSSI or STBs behaviours; 2) a higher level of *p-factor* was shown to increase the likelihood of adolescents' persistent of NSSI or STBs behaviours when compared to the healthy group; 3) the *p-factor* also contributes to the development of SA when compared to the NSSI or SI, but no different pathways were found between the occurrence of NSSI and SI; 4) the higher level of impulsivity inhibition abilities (the motivation to avoidance the aversive outcome) was found to increase the likelihood of adolescents' persistent of NSSI or STBs, but not be a specific risk factor underlying the development of more risky STBs (e.g., SI or SA). Altogether, these findings shed light on the shared and unique risk factors of the occurrence of NSSI or STBs, which would pave the way for the design of future prevention or intervention program to reduce the possibilities of the subsequent mental health crisis.

Potential neurobiological makers for STB and NSSI transition were further detected, including several common cortical regions, including the prefrontal cortex (PFC), insula, and cingulate cortex (CC). These regions' structural and functional alterations were repeatedly reported to be associated with STB and NSSI in previous studies.<sup>23,28,29</sup> Indeed, these brain structure and function disturbances could further lead to alterations in associated brain networks. More specifically, PFC has long been understood as the seat of impulse control,<sup>30</sup> while high impulsivity was consistently seen as a risk factor for individuals' STB and NSSI.<sup>30,31</sup> Therefore, abnormalities in the PFC structure may mediate the associations of impulsivity suppression with STB and NSSI in children. Besides, CC and insula were considered key hubs in pain processing

and emotion processing. 11 Moreover, as shown in previous studies, participants with STB or NSSI history always performed aberrant pain perception,<sup>32,33</sup> and emotion dysregulation.<sup>34,35</sup> However, the cross-sectional nature of these studies makes it impossible to infer a causal relationship between altered brain structure and individual's STB and NSSI. Our findings provide novel evidence that the early change in children's PFC, insula, and CC may serve as neurobiological markers for children's STB and NSSI transition.

In addition to the individual role of these brain regions, their temporal and spatial associations also significantly impact children's STB and NSSI transition. For instance, the asynchronous development between PFC and CC would induce children's risky behaviours,<sup>36</sup> since CC matures earlier than PFC, which could make children uncontrollably resort to extreme forms of emotional outbursts. Meanwhile, Taylor and colleagues have long identified two resting-state functional connectivity (RSFC) between insula and CC that were closely linked to interception, including the anterior insula to the pregenual anterior cingulate cortex (pACC)/anterior mid-cingulate cortex (aMCC) and the entire insula to mid-cingulate cortex(MCC).<sup>37</sup> Abnormalities in these RSFCs may lead to interoceptive deficits, which were potential crucial indicators for STB and NSSI risk.<sup>38,39</sup> Besides, the connection between the insula, CC, and amygdala could potentiate participants' neuro responses to negative stimuli<sup>40</sup>, which might also serve as risk factors for children's latter STB and NSSI.

In line with the previous studies, the *p-factor* as a general factor of psychopathology was functioning as a predictor of individuals at risk for suicide<sup>17</sup>. However, such findings are generally derived from cross-sectional studies that do not distinguish the temporal sequence of

these associations. Our findings extended these previous studies and provided new evidence to our understanding of the underlying mechanism by reporting the *p-factor* could predict the onset of NSSI or STBs longitudinally. Our finding further found that the *p-factor* as a risk factor may distinguish different types of STBs. Specifically, our findings showed that the score of the *p-factor* could be sufficient to distinguish between individuals who develop and persist in NSSI or have SI in a later year and individuals who subsequently engage in suicide attempts<sup>41</sup>. In line with the ideation-to-action framework, these findings further imply that the score of the *p-factor* may be a high-risk marker for the onset and transition of these serious public health problems. Notwithstanding, the *p-factor* does not show a prominent role in the transition trajectory between the occurrence of NSSI and suicidal ideation. A possible explanation is that the underlying mechanism of NSSI and SI are distinct, with distinct explanations and predictors. For example, NSSI refers to an individual's self-harm behaviour without the intention to die. More research is needed to explore the potential predictors during these processes further.

Interestingly, we found the prediction role of behavioural inhibition system for the onset of NSSI or STBs overtimes. Given that BIS is sensitive to signals of punishment and concerned with avoiding unfavourable situations<sup>42</sup>, individuals with a higher tendency of BIS may be more likely to develop self-harm or STBs as the maladaptive coping strategies<sup>43</sup>. Moreover, the role of the behavioural inhibition system is particularly noteworthy because it has been thought to hasten the transition from suicidal thoughts to action<sup>44</sup>. However, we found that the adolescent's BIS showed no difference across the NSSI, SI or SA subgroups during the transition processes, which is consistent with a previous study that found that the individual with NSSI showed similarity level of impulsivity when compared to the individual with STBs<sup>45</sup>. Therefore, more

research and further corroboration are needed to examine the underlying explanation for the similar level of BIS for different development trajectories of suicide risks.

Nonetheless, several limitations need to be addressed. First, the current studies cannot depict a complete picture of predictor variables for developing various NSSI or STB behaviours among adolescents. Second, the relatively imbalanced sample size for each transition subgroup may lead to measurement bias. Despite that, this study is the first to look at the predictive factors for the different transitions of NSSI and STBs from the biopsychosocial framework. Future research must include more participants in different subgroups to decrease the relatively small and unequal subgroup sizes which may leading to the measurement bias. Second, we only used the two-wave datasets, and the multi-wave longitudinal studies (e.g., ecological momentary assessment) are warranted to capture more dynamic changes during these processes.

Our study provides comprehensive insights into the early signs of suicidality or NSSI transition in children, which cannot be recognized subjectively. The clinical significance of the p-factor, BIS, and different brain regions on individuals' transition of NSSI or STBs and the changes to high-risk suicide behaviours have warranted our attention. In this case, the early identification of those factors may help to design the early prevention or intervention strategies to prevent the occurrence of more serious public health issues.

### **Contributors**

CRS, ZXQ CZX, WX and QDY designed the study. WX, QDY, LDY and SYN analyses the data. WX, QDY, WYZ, CRS, ZXQ, CZX interpret data. WX and QDY wrote the first draft of

the manuscript. WX made the figures. CRS, QDY, CZX, WYZ, ZXQ revised the manuscript critically. All authors contributed feedback and approved the final manuscript.

### **Declaration of interests**

We declare no competing interests.

### **Acknowledgments**

We thank the Adolescent Brain Cognitive Development (ABCD) participants and their families for their time and dedication to this project. Data used in the preparation of this article were obtained from the ABCD Study (<https://abcdstudy.org>) and are held in the NIMH Data Archive (NDA). This is a multisite, longitudinal study designed to recruit more than 10,000 children aged 9-10 and follow them over 10 years into early adulthood. The ABCD Study is supported by the National Institutes of Health (NIH) and additional federal partners under award numbers U01DA0401048, U01DA050989, U01DA051016, U01DA041022, U01DA051018, U01DA051037, U01DA050987, U01DA041174, U01DA041106, U01DA041117, U01DA041028, U01DA041134, U01DA050988, U01DA051039, U01DA041156, U01DA041025, U01DA041120, U01DA051038, U01DA041148, U01DA041093, U01DA041089, U24DA041123, U24DA041147. A full list of supporters is available at <https://abcdstudy.org/federal-partners.html>. A listing of participating sites and a complete listing of the study investigators can be found at <https://abcdstudy.org/principal-investigators/>. ABCD consortium investigators designed and implemented the study and/or provided data but did not necessarily participate in the analysis or writing of this report. This manuscript reflects the views of the authors and may not reflect the opinions or views of the NIH or ABCD consortium



investigators. The ABCD repository grows and changes over time. The ABCD data used in this report came from <http://dx.doi.org/10.15154/1523041>. DOIs can be found at <nda.nih.gov>.

## References:

1. Lim KS, Wong CH, McIntyre RS, et al. Global Lifetime and 12-Month Prevalence of Suicidal Behavior, Deliberate Self-Harm and Non-Suicidal Self-Injury in Children and Adolescents between 1989 and 2018: A Meta-Analysis. *Int J Environ Res Public Health* 2019; **16**(22).
2. Swannell SV, Martin GE, Page A, Hasking P, St John NJ. Prevalence of nonsuicidal self-injury in nonclinical samples: systematic review, meta-analysis and meta-regression. *Suicide Life Threat Behav* 2014; **44**(3): 273-303.
3. Tang W-C, Lin M-P, You J, Wu JY-W, Chen K-C. Prevalence and psychosocial risk factors of nonsuicidal self-injury among adolescents during the COVID-19 outbreak. *Current Psychology* 2021.
4. Biswas T, Scott JG, Munir K, et al. Global variation in the prevalence of suicidal ideation, anxiety and their correlates among adolescents: A population based study of 82 countries. *eClinicalMedicine* 2020; **24**.
5. Campisi SC, Carducci B, Akseer N, Zasowski C, Szatmari P, Bhutta ZA. Suicidal behaviours among adolescents from 90 countries: a pooled analysis of the global school-based student health survey. *BMC Public Health* 2020; **20**(1): 1102.
6. Hedegaard H, Curtin SC, Warner M. Suicide Mortality in the United States, 1999-2019. *NCHS data brief* 2021; **398**: 1-8.
7. Abio A, Owusu PN, Posti JP, et al. Cross-national examination of adolescent suicidal behavior: a pooled and multi-level analysis of 193,484 students from 53 LMIC countries. *Social Psychiatry and Psychiatric Epidemiology* 2022; **57**(8): 1603-13.
8. Harms MB, Casement MD, Teoh JY, et al. Adolescent suicide attempts and ideation are linked to brain function during peer interactions. *Psychiatry Res Neuroimaging* 2019; **289**: 1-9.
9. Lucena NL, Rossi TA, Azevedo LMG, Pereira M. Self-injury prevalence in adolescents: A global systematic review and meta-analysis. *Children and Youth Services Review* 2022; **142**: 106634.
10. Kapur N, Cooper J, O'Connor RC, Hawton K. Non-suicidal self-injury v. attempted suicide: new diagnosis or false dichotomy? *Br J Psychiatry* 2013; **202**(5): 326-8.
11. Wolff J, Frazier EA, Esposito-Smythers C, Burke T, Sloan E, Spirito A. Cognitive and social factors associated with NSSI and suicide attempts in psychiatrically hospitalized adolescents. *J Abnorm Child Psychol* 2013; **41**(6): 1005-13.
12. Blasco MJ, Vilagut G, Alayo I, et al. First-onset and persistence of suicidal ideation in university students: A one-year follow-up study. *Journal of Affective Disorders* 2019; **256**: 192-204.
13. Bentley KH, Cassiello-Robbins CF, Vittorio L, Sauer-Zavala S, Barlow DH. The association between nonsuicidal self-injury and the emotional disorders: A meta-analytic review. *Clinical Psychology Review* 2015; **37**: 72-88.
14. Caspi A, Houts RM, Belsky DW, et al. The p Factor: One General Psychopathology Factor in the Structure of Psychiatric Disorders? *Clin Psychol Sci* 2014; **2**(2): 119-37.
15. Patalay P, Fonagy P, Deighton J, Belsky J, Vostanis P, Wolpert M. A general psychopathology factor in early adolescence. *Br J Psychiatry* 2015; **207**(1): 15-22.
16. Cui Z, Pines AR, Larsen B, et al. Linking Individual Differences in Personalized Functional Network Topography to Psychopathology in Youth. *Biol Psychiatry* 2022.

17. Ruan-Iu L, Rivers AS, Barzilay R, Moore TM, Tien A, Diamond G. Identifying Youth at Risk for Suicidal Thoughts and Behaviors Using the "p" factor in Primary Care: An Exploratory Study. *Arch Suicide Res* 2022; 1-16.
18. Cipriano A, Cella S, Cotrufo P. Nonsuicidal Self-injury: A Systematic Review. *Frontiers in Psychology* 2017; **8**(1946).
19. Klonsky ED, May AM. The Three-Step Theory (3ST): A new theory of suicide rooted in the "ideation-to-action" framework. *International Journal of Cognitive Therapy* 2015; **8**: 114-29.
20. Bryan CJ, Kyron M, Page AC. BIS sensitivity, BAS sensitivity, and recent suicide attempts. *Personality and Individual Differences* 2022; **191**: 111552.
21. O'Connor RC, Forgan G. Suicidal Thinking and Perfectionism: The Role of Goal Adjustment and Behavioral Inhibition/Activation Systems (BIS/BAS). *Journal of Rational-Emotive & Cognitive-Behavior Therapy* 2007; **25**(4): 321-41.
22. Parvaz S, Parvaz S, Parvaz Y. Relationship between suicide ideation and Behavioral Inhibition/Activation Systems (BIS/BAS) and perfectionism. 2015; **18**(12): e70729.
23. Schmaal L, van Harmelen A-L, Chatzi V, et al. Imaging suicidal thoughts and behaviors: a comprehensive review of 2 decades of neuroimaging studies. *Molecular Psychiatry* 2020; **25**(2): 408-27.
24. Brañas M, Croci MS, Ravagnani Salto AB, et al. Neuroimaging Studies of Nonsuicidal Self-Injury in Youth: A Systematic Review. *Life (Basel)* 2021; **11**(8).
25. Casey BJ, Cannonier T, Conley MI, et al. The Adolescent Brain Cognitive Development (ABCD) study: Imaging acquisition across 21 sites. *Dev Cogn Neurosci* 2018; **32**: 43-54.
26. Moore TM, Kaczurkin AN, Durham EL, et al. Criterion validity and relationships between alternative hierarchical dimensional models of general and specific psychopathology. *Journal of abnormal psychology* 2020; **129**(7): 677.
27. Carver CS, White TL. Behavioral inhibition, behavioral activation, and affective responses to impending reward and punishment: the BIS/BAS scales. *Journal of personality and social psychology* 1994; **67**(2): 319.
28. van Heeringen K, Mann JJ. The neurobiology of suicide. *Lancet Psychiatry* 2014; **1**(1): 63-72.
29. Ho TC, Walker JC, Teresi GI, et al. Default mode and salience network alterations in suicidal and non-suicidal self-injurious thoughts and behaviors in adolescents with depression. *Transl Psychiatry* 2021; **11**(1): 38.
30. Spinella M. Neurobehavioral correlates of impulsivity: evidence of prefrontal involvement. *Int J Neurosci* 2004; **114**(1): 95-104.
31. Cassels M, Neufeld S, van Harmelen AL, Goodyer I, Wilkinson P. Prospective Pathways From Impulsivity to Non-Suicidal Self-Injury Among Youth. *Arch Suicide Res* 2022; **26**(2): 534-47.
32. Franklin JC, Hessel ET, Prinstein MJ. Clarifying the role of pain tolerance in suicidal capability. *Psychiatry Res* 2011; **189**(3): 362-7.
33. Conejero I, Olié E, Calati R, Ducasse D, Courtet P. Psychological Pain, Depression, and Suicide: Recent Evidences and Future Directions. *Curr Psychiatry Rep* 2018; **20**(5): 33.
34. Law K, Khazem L, Anestis M. The role of emotion dysregulation in suicide as considered through the ideation to action framework. *Current Opinion in Psychology* 2015; **3**: 30-5.
35. Wolff JC, Thompson E, Thomas SA, et al. Emotion dysregulation and non-suicidal self-injury: A systematic review and meta-analysis. *Eur Psychiatry* 2019; **59**: 25-36.

36. Casey B, Jones RM, Somerville LH. Braking and Accelerating of the Adolescent Brain. *J Res Adolesc* 2011; **21**(1): 21-33.
37. Taylor KS, Seminowicz DA, Davis KD. Two systems of resting state connectivity between the insula and cingulate cortex. *Hum Brain Mapp* 2009; **30**(9): 2731-45.
38. Brausch AM, Woods SE. Emotion Regulation Deficits and Nonsuicidal Self-Injury Prospectively Predict Suicide Ideation in Adolescents. *Suicide Life Threat Behav* 2019; **49**(3): 868-80.
39. Hielscher E, Zopf R. Interoceptive Abnormalities and Suicidality: A Systematic Review. *Behavior Therapy* 2021; **52**(5): 1035-54.
40. Lengvenyte A, Conejero I, Courtet P, Olié E. Biological bases of suicidal behaviours: A narrative review. *Eur J Neurosci* 2021; **53**(1): 330-51.
41. Huang X, Ribeiro JD, Franklin JC. The Differences Between Individuals Engaging in Nonsuicidal Self-Injury and Suicide Attempt Are Complex (vs. Complicated or Simple). *Frontiers in Psychiatry* 2020; **11**.
42. Scholten MRM, van Honk J, Aleman A, Kahn RS. Behavioral inhibition system (BIS), Behavioral activation system (BAS) and schizophrenia: Relationship with psychopathology and physiology. *Journal of Psychiatric Research* 2006; **40**(7): 638-45.
43. Czyz EK, Glenn CR, Busby D, King CA. Daily patterns in nonsuicidal self-injury and coping among recently hospitalized youth at risk for suicide. *Psychiatry Res* 2019; **281**: 112588.
44. Klonsky ED, May AM, Saffer BY. Suicide, Suicide Attempts, and Suicidal Ideation. *Annu Rev Clin Psychol* 2016; **12**(1): 307-30.
45. Ammerman BA, Kleiman EM, Jenkins AL, Berman ME, McCloskey MS. Using Propensity Scores to Examine the Association Between Behavioral Inhibition/Activation and Nonsuicidal and Suicidal Self-Injury. *Crisis* 2017; **38**(4): 227-36.

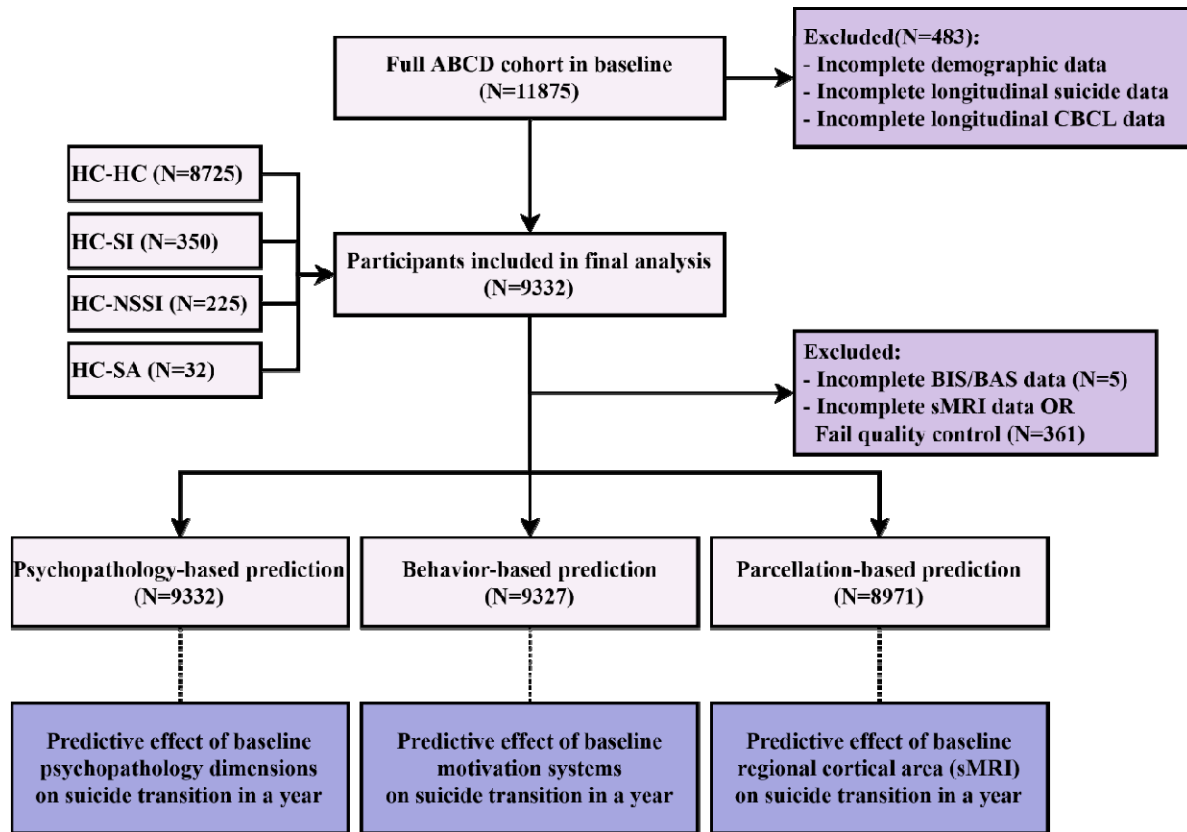

Figure 1. The operational flowchart of the present study.

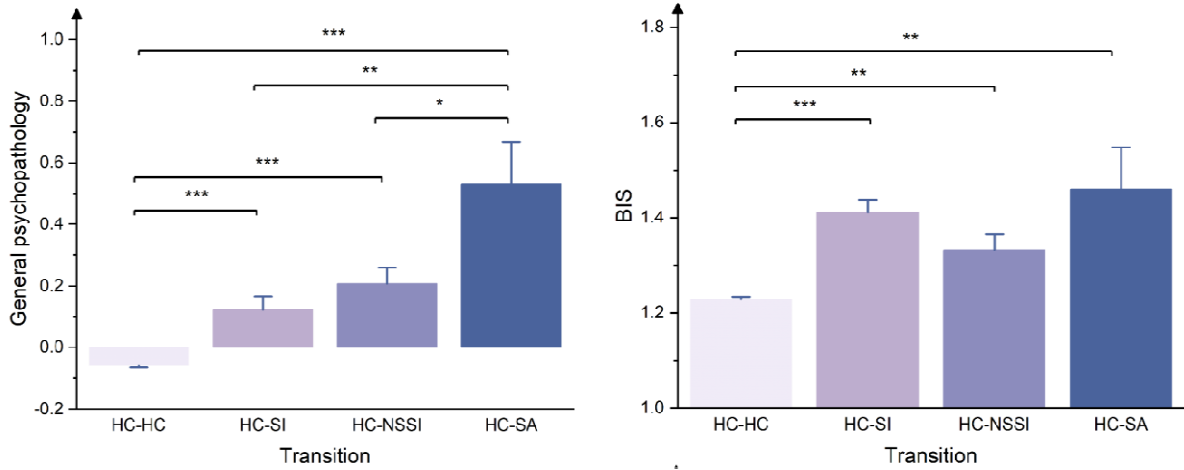

Figure 2. Characteristics of general psychopathology and BIS before STB and NSSI transition

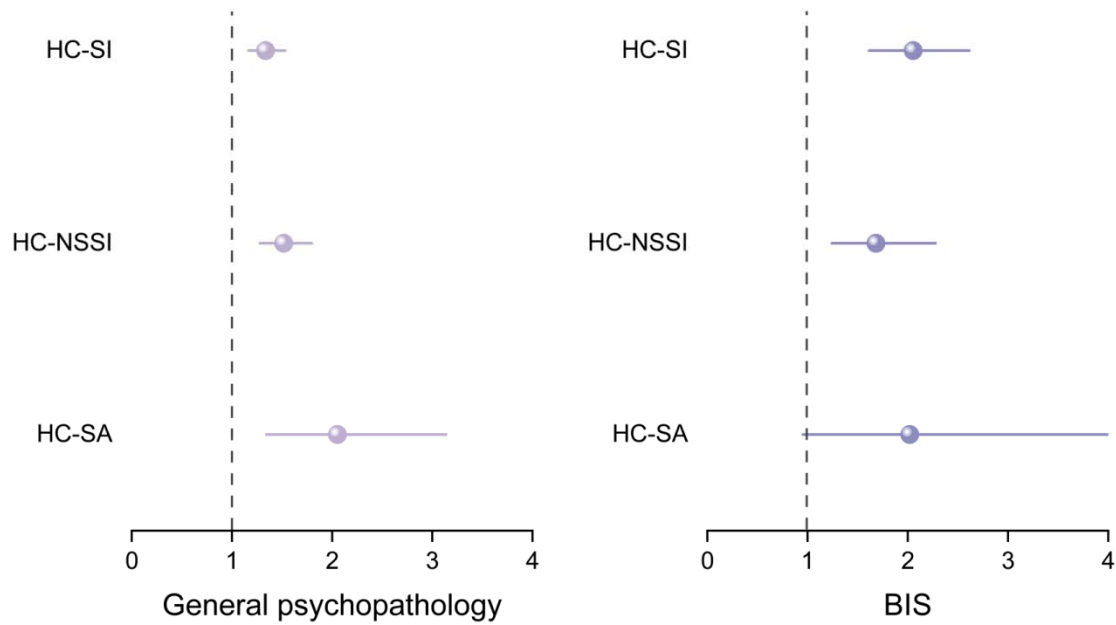

Figure 3. The predictive effect of general psychopathology and BIS on STB and NSSI transitions

It is made available under a [CC-BY-NC-ND 4.0 International license](https://creativecommons.org/licenses/by-nc-nd/4.0/).

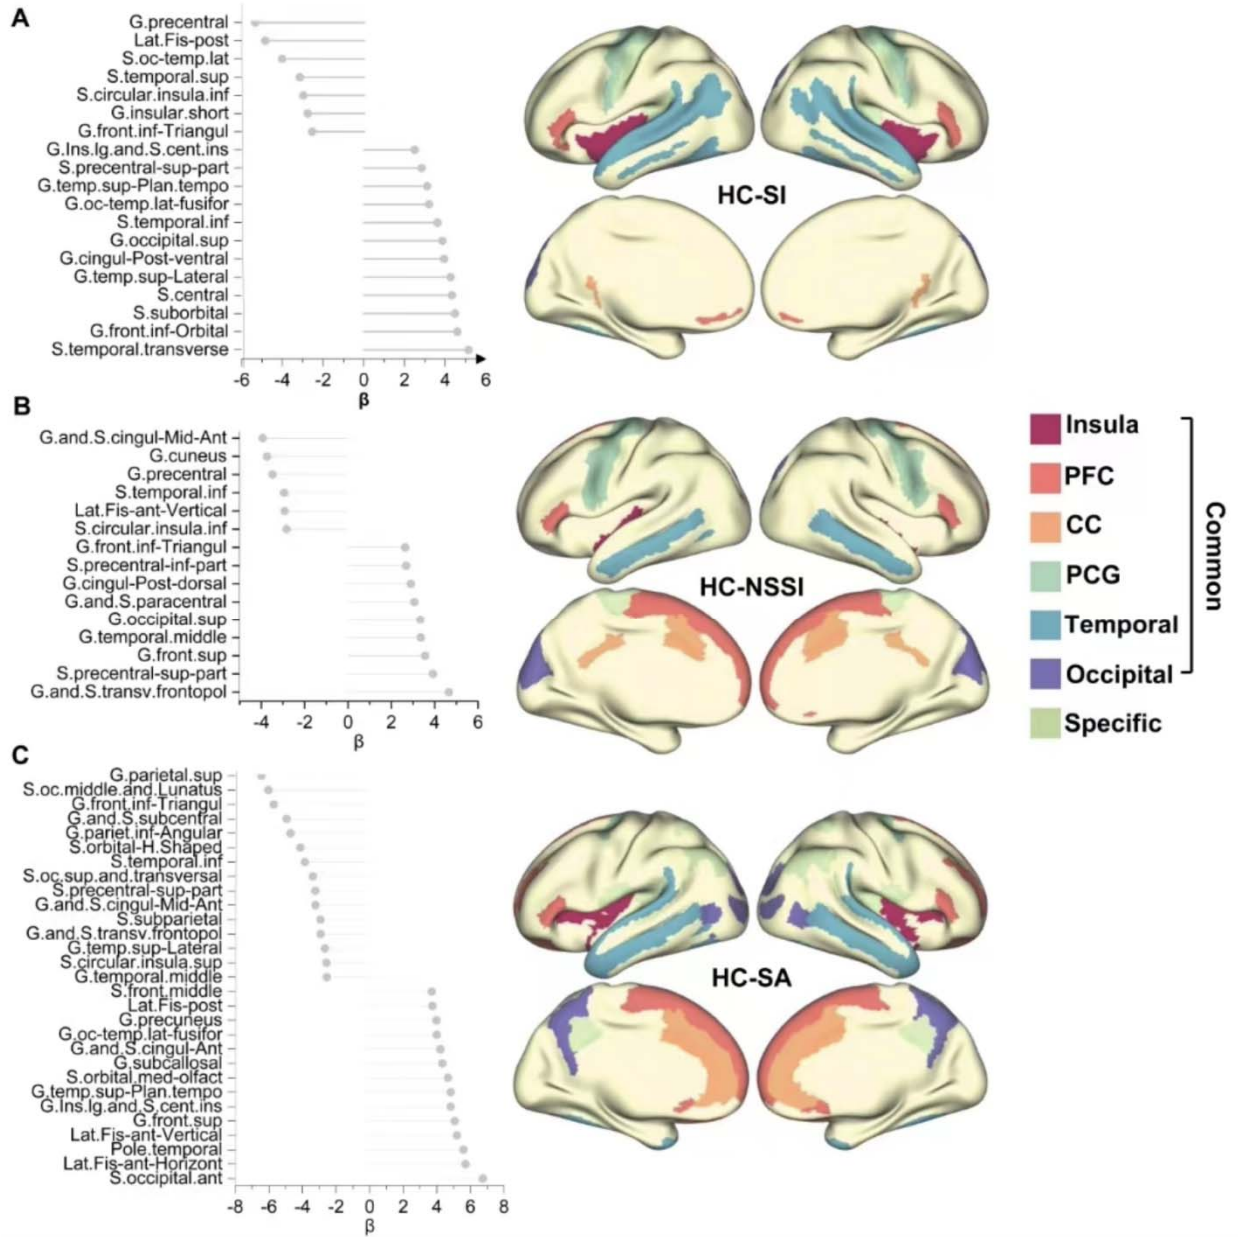

Figure 4. The predictive effect of cortical area on STB and NSSI transitions
